# Supplementary material for: Local-scale impact of wind energy farms on rare, endemic, and threatened plant species
Source: PeerJ journal article supplement (doi:10.7717/peerj.11390), 2021-05-19

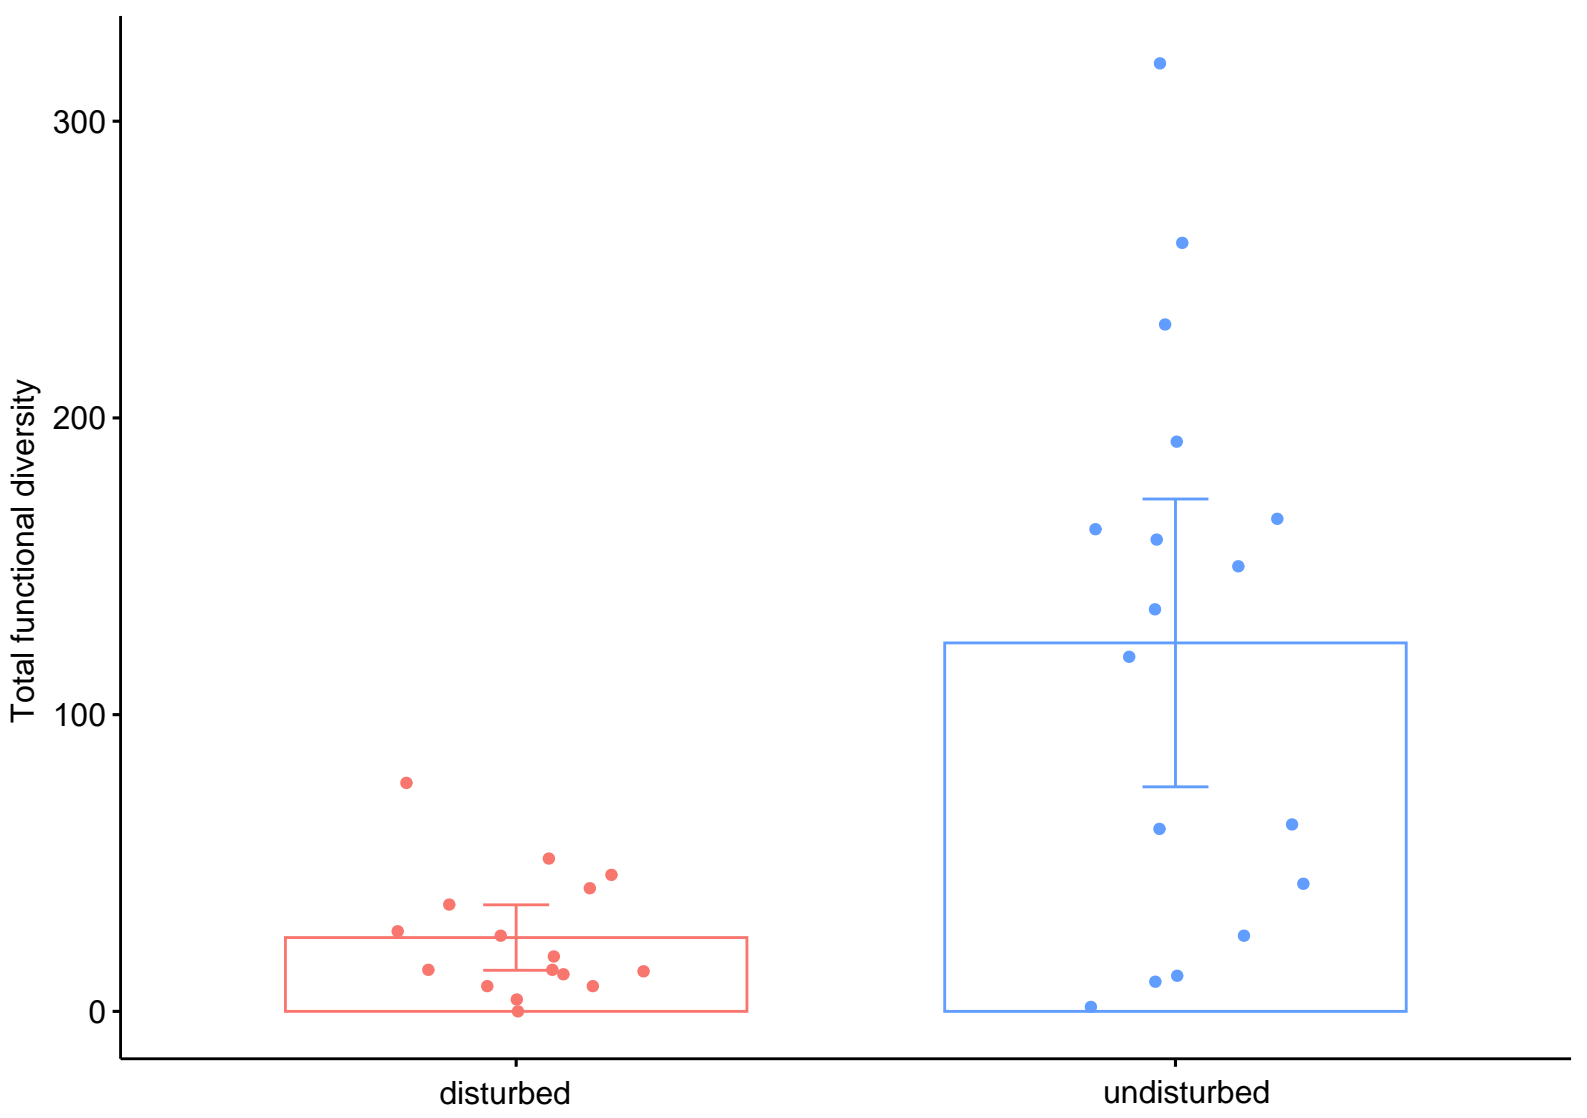

Supplement: Figure_S3_rev1.pdf [file Figure_S3_rev1.pdf]
