# Supplementary material for: Local-scale impact of wind energy farms on rare, endemic, and threatened plant species
Source: PeerJ. 2021 May 19;9:e11390. doi: 10.7717/peerj.11390 (PMC8140595; doi:10.7717/peerj.11390)
Supplement: Supplemental Information 1 — (A) Codes for wind turbines: CC_01, CC_02, CC_03, CC_04, CC_05, DP_1, DP_2, DP_3, DP_4, DP_5, DP_6, DP_7, DP_8, DP_9, DP_10, DP_11, DP_12. (B) a, disturbed plots; p, undisturbed plots. (C) Ch, Chamaephytes; G, Geophytes; H, Hemicryptophytes; Th, Therophytes. [file peerj-09-11390-s001.xlsx]

## Sheet: Data
taxa.id	Taxa	CC_01 p	CC_02 p	CC_03 p	CC_04 p	CC_05 p	DP_01 p	DP_02 p	DP_03 p	DP_04 p	DP_05 p	DP_06 p	DP_07 p	DP_08 p	DP_09 p	DP_10 p	DP_11 p	DP_12 p	CC_01 a	CC_02 a	CC_03 a	CC_04 a	CC_05 a	DP_01 a	DP_02 a	DP_03 a	DP_04 a	DP_05 a	DP_06 a	DP_07 a	DP_08 a	DP_09 a	DP_10 a	DP_11 a	DP_12 a	Life.span	Life.form	Vegetative.reproduc	Seed dispersion
SP13	Adonis flammea Jacq.	1	0	0	0	0	0	0	0	0	0	0	0	0	1	0	0	1	0	1	0	0	1	0	0	0	0	0	0	0	1	1	0	1	1	annual	Th	No	barochory
SP18	Adonis vernalis L.	0	0	0	0	0	0	0	0	0	0	0	0	0	0	0	0	0	1	0	0	1	1	0	0	0	0	0	1	1	0	0	1	1	1	perennial	H	No	barochory
SP20	Allium flavum subsp. tauricum (Besser ex Rchb.) K. Richt.	0	0	0	0	0	0	0	0	0	0	0	0	0	0	0	0	0	1	0	0	1	0	1	0	0	0	0	0	0	0	1	0	0	1	perennial	G	Yes	barochory
SP40	Allium guttatum Steven	0	0	0	0	0	0	0	0	0	0	0	0	0	0	0	0	0	0	0	0	0	0	0	0	0	0	0	0	0	1	0	0	0	0	perennial	G	Yes	barochory
SP41	Allium saxatile M. Bieb.	0	0	0	0	0	0	0	0	0	0	0	0	0	0	0	0	0	1	0	0	0	0	0	0	0	0	0	0	0	0	0	0	0	0	perennial	G	Yes	barochory
SP21	Alyssum caliacrae Nyár.	0	0	0	0	0	0	0	0	0	0	1	0	0	0	0	0	1	0	0	0	0	0	0	0	0	0	0	1	0	0	0	1	0	1	perennial	Ch	No	anemochory
SP1	Alyssum hirsutum M. Bieb.	1	1	1	1	1	0	0	1	1	1	1	1	1	1	1	0	1	1	1	1	1	1	0	0	0	0	1	1	1	1	1	1	1	1	annual	Th	No	anemochory
SP32	Asparagus verticillatus L.	0	0	0	0	0	0	0	0	0	0	0	0	0	0	0	0	0	0	0	0	1	0	0	0	1	0	0	0	0	0	0	0	0	0	perennial	G	Yes	multiple
SP11	Astragalus glaucus M. Bieb.	0	0	0	0	0	0	0	0	0	0	0	1	0	0	1	0	0	0	0	0	0	0	0	0	0	0	1	1	1	1	1	1	1	1	perennial	H	No	multiple
SP42	Astragalus ponticus Pall.	0	0	0	0	0	0	0	0	0	0	0	0	0	0	0	0	0	1	0	0	0	0	0	0	0	0	0	0	0	0	0	0	0	0	perennial	H	No	multiple
SP6	Bombycilaena erecta (L.) Smoljan.	1	1	1	1	0	0	1	0	0	0	0	0	0	0	0	0	1	1	0	1	1	1	1	0	0	1	0	1	1	0	0	0	1	1	annual	Th	No	anemochory
SP33	Bupleurum apiculatum Friv.	0	0	0	0	0	0	0	0	0	0	0	0	0	0	0	0	0	0	1	1	0	0	0	0	0	0	0	0	0	0	0	0	0	0	annual	Th	No	anemochory
SP43	Calepina irregularis (Asso) Thell.	0	0	0	0	0	0	0	0	0	0	0	0	0	0	0	0	0	0	0	0	0	0	0	0	1	0	0	0	0	0	0	0	0	0	annual	Th	No	autochory
SP44	Campanula romanica Savul.	0	0	0	0	0	0	0	0	0	0	0	0	0	0	0	0	0	0	0	0	0	0	0	0	0	0	0	0	0	1	0	0	0	0	perennial	H	No	multiple
SP45	Carex brevicollis DC.	0	0	0	0	0	0	0	0	0	0	0	0	0	0	0	0	0	0	0	0	0	0	0	0	1	0	0	0	0	0	0	0	0	0	perennial	G	Yes	barochory
SP19	Centaurea kanitziana D. Brândza	0	0	0	0	0	0	0	0	1	0	1	0	1	0	1	0	0	0	0	0	0	0	0	0	0	1	0	1	0	1	0	1	0	0	annual	Th	No	anemochory
SP28	Cerastium gracile Dufour	0	0	0	0	0	0	0	0	0	0	0	0	0	1	0	0	0	0	0	0	0	0	0	0	0	0	0	0	0	0	1	0	0	1	annual	Th	No	multiple
SP25	Colchicum triphyllum Kunze	0	0	0	0	0	0	0	0	0	0	0	0	0	0	0	0	0	0	0	0	0	0	1	0	0	1	0	1	0	0	0	1	0	0	perennial	G	Yes	multiple
SP34	Corydalis solida subsp. slivenensis (Velen.) Hayek	0	0	0	0	0	0	0	0	0	0	0	0	0	0	0	0	0	0	0	0	0	0	1	0	1	0	0	0	0	0	0	0	0	0	perennial	G	Yes	multiple
SP14	Crocus danubensis Kernd., Pasche, N. Randjelovic & V. Randjelovic	0	0	0	0	0	0	0	0	0	0	0	0	0	0	0	0	0	0	0	0	1	1	1	1	1	1	0	1	0	0	0	1	0	1	perennial	G	Yes	multiple
SP46	Crocus pallasii Goldb.	0	0	0	0	0	0	0	0	0	0	0	0	0	0	0	0	0	0	0	0	0	0	0	0	0	1	0	0	0	0	0	0	0	0	perennial	G	Yes	multiple
SP47	Cyanus thirkei (Sch. Bip.) Holub	0	0	0	0	0	0	0	0	0	0	0	0	0	0	0	0	0	0	0	0	0	0	1	0	0	0	0	0	0	0	0	0	0	0	perennial	H	Yes	multiple
SP48	Daucus guttatus subsp. zahariadii Heywood	0	0	0	0	0	0	0	0	0	0	0	0	0	0	0	0	0	1	0	0	0	0	0	0	0	0	0	0	0	0	0	0	0	0	annual	Th	No	zoochory
SP8	Dianthus nardiformis Janka	1	0	0	0	0	0	0	0	1	0	0	0	0	1	0	0	0	1	0	0	1	1	0	0	0	1	0	1	1	1	1	1	0	1	perennial	Ch	No	multiple
SP7	Echinops ritro subsp. ruthenicus (M. Bieb.) Nyman	1	0	0	0	1	0	0	0	0	1	1	0	1	1	1	0	0	1	0	0	1	1	0	0	0	0	1	1	0	1	1	1	0	1	perennial	H	No	anemochory
SP9	Euphorbia myrsinites L.	0	0	0	0	0	0	0	0	0	1	1	1	0	0	1	1	0	0	0	0	0	0	0	0	0	0	1	1	1	0	1	1	1	1	perennial	H	Yes	zoochory
SP10	Euphorbia nicaeensis subsp. dobrogensis (Prodán) Kuzmanov	0	0	0	0	0	0	0	0	0	0	0	1	0	1	1	1	0	1	0	0	0	1	0	0	0	0	1	1	1	0	1	1	0	1	perennial	H	Yes	zoochory
SP35	Galanthus plicatus M. Bieb.	0	0	0	0	0	0	0	0	0	0	0	0	0	0	0	0	0	0	0	0	0	0	1	0	1	0	0	0	0	0	0	0	0	0	perennial	G	Yes	multiple
SP49	Hedysarum grandiflorum Pall. subsp. grandiflorum	0	0	0	0	0	0	0	0	0	0	0	0	0	0	0	0	0	0	0	0	0	1	0	0	0	0	0	0	0	0	0	0	0	0	perennial	H	Yes	multiple
SP50	Himantoglossum calcaratum (G.Beck) Schltr. subsp. jankae (Somlyay, Kreutz & Óvári) Bateman, Molnár & Sramkó	0	0	0	0	0	0	0	0	0	0	0	0	0	0	0	0	0	0	0	0	0	0	0	0	1	0	0	0	0	0	0	0	0	0	perennial	G	Yes	anemochory
SP51	Hornungia petraea (L.) Rchb.	0	0	0	0	0	0	0	0	0	0	0	0	0	0	0	0	0	0	0	0	0	0	0	0	0	0	0	0	0	0	0	0	1	0	annual	Th	No	barochory
SP15	Hyacinthella leucophaea (K. Koch) Schur	0	0	0	0	0	0	0	0	0	0	1	0	0	0	0	0	0	0	0	0	0	0	1	0	0	0	1	1	0	1	1	1	1	1	perennial	G	Yes	multiple
SP52	Hyoscyamus niger L.	0	0	0	0	0	0	0	0	0	0	0	0	1	0	0	0	0	0	0	0	0	0	0	0	0	0	0	0	0	0	0	0	0	0	annual	Th	No	barochory
SP53	Iris sintenisii Janka	0	0	0	0	0	0	0	0	0	0	0	0	0	0	0	0	0	0	0	0	0	0	0	0	1	0	0	0	0	0	0	0	0	0	perennial	G	Yes	multiple
SP4	Koeleria lobata (M. Bieb.) Roem. & Schult.	0	0	0	0	0	0	0	0	0	1	1	1	1	1	0	1	1	1	0	0	1	1	0	0	0	1	1	1	1	1	1	0	1	1	perennial	H	Yes	multiple
SP54	Lathyrus cicera L.	0	0	0	0	0	0	0	0	0	0	0	0	0	0	0	0	0	1	0	0	0	0	0	0	0	0	0	0	0	0	0	0	0	0	annual	Th	No	multiple
SP12	Minuartia adenotricha Schischk.	1	0	1	0	0	0	0	0	0	0	0	0	0	0	1	0	1	1	0	0	0	0	0	0	0	0	0	0	0	1	1	1	1	1	perennial	H	No	multiple
SP29	Minuartia hybrida (Vill.) Schischk.	0	0	0	0	0	0	0	0	0	0	0	0	0	1	0	0	0	0	0	0	0	0	0	0	0	0	0	0	0	0	0	1	1	0	annual	Th	No	multiple
SP3	Muscari neglectum Guss. ex Ten.	0	1	0	1	0	0	0	1	1	1	1	1	0	0	1	1	0	1	1	0	1	1	0	0	1	1	1	1	0	0	0	1	1	0	perennial	G	Yes	multiple
SP55	Onobrychis gracilis Besser	0	0	0	0	0	0	0	0	0	0	0	0	0	0	0	0	0	0	0	0	0	0	0	0	0	0	0	0	1	0	0	0	0	0	perennial	H	Yes	multiple
SP56	Orchis simia Lam.	0	0	0	0	0	0	0	0	0	0	0	0	0	0	0	0	0	0	0	0	0	0	0	0	0	1	0	0	0	0	0	0	0	0	perennial	G	Yes	anemochory
SP57	Ornithogalum amphibolum Zahar.	0	0	0	0	0	0	0	0	0	0	0	0	0	0	0	0	0	0	0	0	0	0	0	0	0	0	0	1	0	0	0	0	0	0	perennial	G	Yes	barochory
SP36	Ornithogalum sigmoideum Freyn & Sint.	0	0	0	0	0	0	0	0	0	0	0	0	0	0	0	0	0	1	0	0	0	0	0	0	0	0	0	1	0	0	0	0	0	0	perennial	G	Yes	barochory
SP22	Paeonia peregrina Mill.	0	0	0	0	0	0	0	0	0	0	0	0	0	0	0	0	0	0	0	1	1	1	1	0	0	1	0	0	0	0	0	0	0	0	perennial	H	Yes	multiple
SP23	Paronychia cephalotes (M. Bieb.) Besser	0	0	0	0	0	0	0	0	0	0	0	0	0	0	0	0	0	0	0	0	0	1	0	0	0	0	0	0	0	1	1	1	1	0	perennial	Ch	No	anemochory
SP58	Piptatherum virescens (Trin.) Boiss.	0	0	0	0	0	0	0	0	0	0	0	0	0	0	0	0	0	0	0	0	0	0	0	0	1	0	0	0	0	0	0	0	0	0	perennial	H	Yes	anemochory
SP37	Potentilla astracanica Jacq.	0	0	0	0	0	0	0	0	0	0	1	0	0	0	0	0	0	0	0	0	0	0	0	0	0	0	0	1	0	0	0	0	0	0	perennial	H	No	barochory
SP26	Salvia nutans L.	0	0	0	0	0	0	0	0	0	0	0	0	0	0	0	0	0	0	0	0	1	1	0	0	0	1	0	0	0	0	0	0	0	1	perennial	H	No	barochory
SP16	Scorzonera mollis M. Bieb.	0	0	0	0	0	0	0	0	0	0	0	0	0	0	0	0	0	0	1	1	1	1	0	1	0	1	1	1	0	0	0	0	0	1	perennial	H	No	anemochory
SP38	Scutellaria orientalis L. var. pinnatifida Rchb.	0	0	0	0	1	0	0	0	0	0	0	0	0	0	0	0	0	0	0	0	0	1	0	0	0	0	0	0	0	0	0	0	0	0	perennial	Ch	No	barochory
SP39	Seseli rigidum subsp. peucedanifolium (Spreng.) Nyman	0	0	0	0	0	0	0	0	0	0	0	0	1	0	0	0	0	0	0	0	0	0	0	0	0	0	0	0	0	0	1	0	0	0	perennial	H	No	multiple
SP17	Silene supina M. Bieb.	0	0	0	0	0	0	0	0	0	0	1	0	0	0	0	1	0	0	0	0	1	1	0	0	0	0	0	1	0	1	0	1	1	1	perennial	Ch	No	anemochory
SP27	Sternbergia colchiciflora Waldst. & Kit.	0	0	0	0	0	0	0	0	0	0	0	0	0	0	0	0	0	0	0	0	1	1	0	0	0	1	0	1	0	0	0	0	0	0	perennial	G	Yes	multiple
SP5	Tanacetum millefolium (L.) Tzvelev	0	0	0	1	1	0	0	1	0	0	1	1	0	0	1	0	1	1	0	0	1	1	0	0	0	1	0	1	1	1	1	1	1	1	perennial	H	Yes	anemochory
SP2	Thymus zygioides Griseb.	1	0	1	1	1	0	0	1	1	1	1	1	1	1	1	1	1	1	0	0	1	1	0	0	1	1	1	1	1	1	1	1	1	1	perennial	Ch	Yes	zoochory
SP30	Trigonella gladiata M. Bieb.	0	0	0	0	0	0	0	0	0	0	0	0	0	0	0	0	0	0	0	0	0	0	0	0	0	1	1	1	0	0	0	0	0	0	annual	Th	No	zoochory
SP59	Valerianella coronata (L.) DC.	0	0	0	0	0	0	0	0	0	0	0	0	0	0	0	0	0	0	0	0	0	0	0	0	0	0	0	0	0	0	1	0	0	0	annual	Th	No	anemochory
SP24	Vicia peregrina L.	0	0	0	0	0	0	0	0	0	0	0	1	0	0	0	0	0	0	0	0	0	0	0	0	0	0	0	0	0	0	0	0	0	0	annual	Th	No	multiple
SP31	Vincetoxicum fuscatum (Hornem.) Rchb. f.	0	0	0	0	0	0	0	0	0	0	0	0	0	0	0	0	0	0	0	0	0	1	0	0	0	0	0	0	0	0	0	0	1	1	perennial	H	No	multiple

## Sheet: Legend
Legend
SP13 …	taxa id
CC_01 p	plot id (p if disturbed; a if undisturbed)
Taxa	name of taxa
Life.span	annual/perennial
Life.form	Th = therophytes, H = hemicryptophytes, G = geophytes, Ch = chamaephytes
Vegetative.reproduc	yes/no
Seed dispersion	barochory, anemochory, zoochory, autochory, multiple
